# Supplementary material for: From mannan to bioethanol: cell surface co-display of β-mannanase and β-mannosidase on yeast Saccharomyces cerevisiae
Source: Springer Nature journal article supplement (doi:10.1186/s13068-016-0600-4), 2016-09-02
Supplement: MOESM1 [file 13068_2016_600_MOESM1_ESM.pdf]

## ***Biotechnology for Biofuels***

### **Additional file 1:**

## **From mannan to bioethanol: cell surface co-display of $\beta$ -mannanase and $\beta$ -mannosidase on yeast *Saccharomyces cerevisiae***

**Jun Ishii<sup>1,†</sup>, Fumiyoshi Okazaki<sup>2,†,§</sup>, Apridah Cameliawati Djohan<sup>3</sup>, Kiyotaka Y Hara<sup>2,§</sup>, Nanami Asai-Nakashima<sup>1</sup>, Hiroshi Teramura<sup>1</sup>, Ade Andriani<sup>3</sup>, Masahiro Tominaga<sup>1</sup>, Satoshi Wakai<sup>1</sup>, Prihardi Kahar<sup>4</sup>, Yopi<sup>3</sup>, Bambang Prasetya<sup>3</sup>, Chiaki Ogino<sup>4,\*</sup>, Akihiko Kondo<sup>1,4,5</sup>**

<sup>1</sup> Graduate School of Science, Technology and Innovation, Kobe University, Kobe, Japan

<sup>2</sup> Organization of Advanced Science and Technology, Kobe University, 1-1 Rokkodai, Nada, Kobe 657-8501, Japan

<sup>3</sup> Research Center for Biotechnology, Indonesian Institute of Sciences, Cibinong, Indonesia

<sup>4</sup> Department of Chemical Science and Engineering, Graduate School of Engineering, Kobe University, Kobe, Japan

<sup>5</sup> RIKEN Center for Sustainable Resource Science, Yokohama, Japan

\*Correspondence: ochiaki@port.kobe-u.ac.jp

<sup>†</sup>Equal contributors

<sup>§</sup>Present address: Department of Life Sciences, Graduate School of Bioresources, Mie University, 1577 Kurimamachiya, Tsu, Mie 514-8507, Japan

<sup>§§</sup>Present address: Department of Environmental Sciences, Graduate School of Nutritional and Environmental Sciences, University of Shizuoka, Shizuoka, Japan.

From mannan to bioethanol: cell surface co-displays of  $\beta$ -mannanase and  $\beta$ -mannosidase on yeast *Saccharomyces cerevisiae*

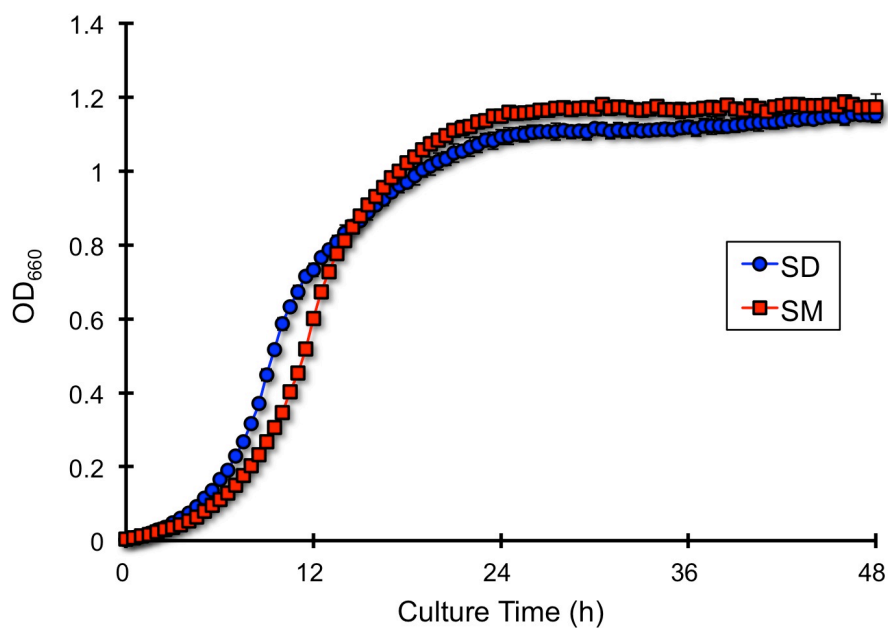

**Figure S1. Growth curves of YPH499 yeast strain in SD and SM media.** YPH499 yeast cells were inoculated at an OD<sub>660</sub> of 0.05 and cultured in SD and SM minimal media containing 2 g/L of glucose and mannose, respectively. The cell growth was determined by monitoring OD<sub>660</sub> every 30 min using a TVS062CA biophotorecorder. Data are presented as the mean  $\pm$  standard deviation of separate cultivations ( $n = 3$  each).

**From mannan to bioethanol: cell surface co-displays of  $\beta$ -mannanase and  $\beta$ -mannosidase on yeast *Saccharomyces cerevisiae***

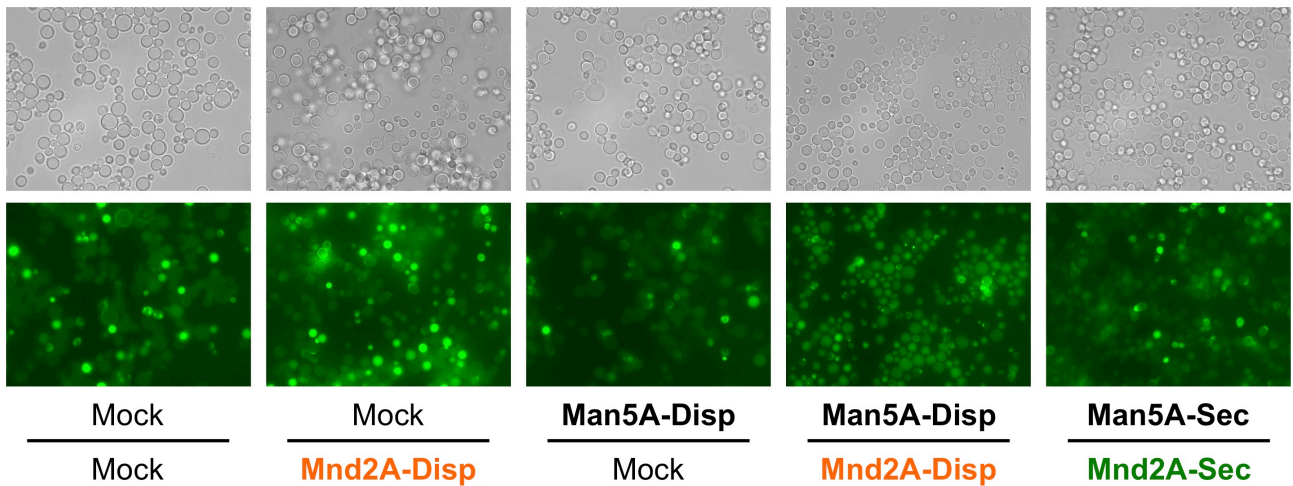

**Figure S2. Fluorescence images of immunostained Mnd2A-displaying and -secreting yeast cells.** Yeast cells immunostained with Alexa Fluor 488-labeled anti-HA antibody. Upper panels show visible light images and lower panels show green fluorescence images. Images correspond to high magnification ( $\times 1,000$ ).

**From mannan to bioethanol: cell surface co-displays of  $\beta$ -mannanase and  $\beta$ -mannosidase on yeast *Saccharomyces cerevisiae***

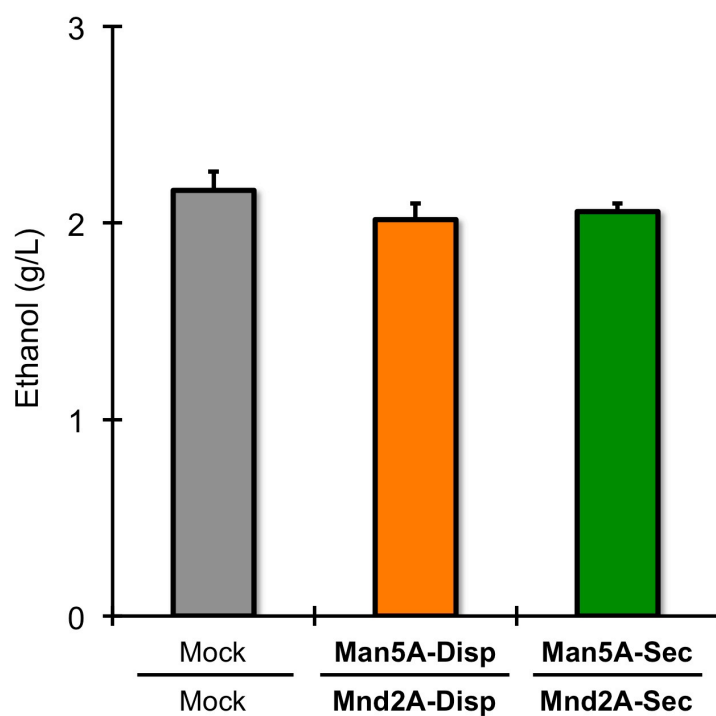

**Figure S3. Ethanol fermentations by yeast cells using mannose as a carbon source.** Fermentations were performed in YPA medium (pH 5.0) containing 5 g/L mannose as a sole carbon source. Fermentations were started with an  $OD_{600}=20$  of yeast cells. The ethanol titers show the values at 18 h of fermentations. Data are presented as the mean  $\pm$  standard deviation of separate cultivations ( $n = 3$  each).

From mannan to bioethanol: cell surface co-displays of  $\beta$ -mannanase and  $\beta$ -mannosidase on yeast *Saccharomyces cerevisiae*

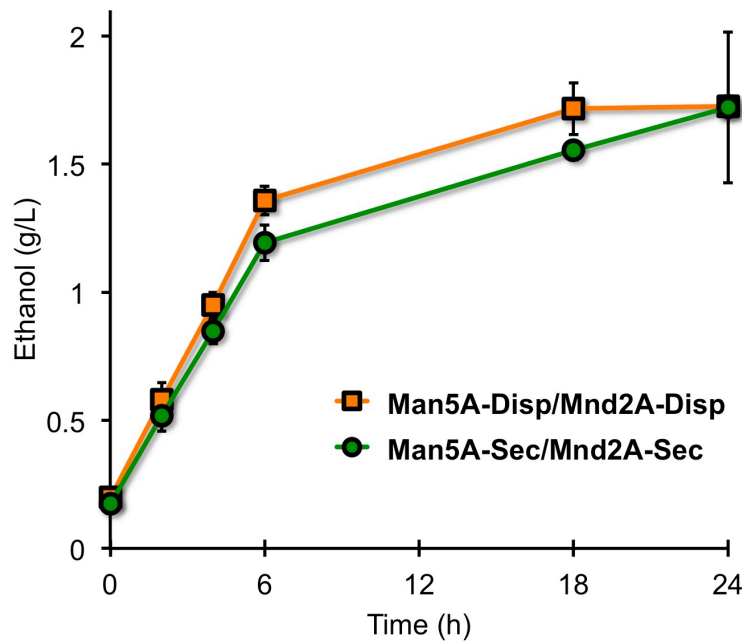

**Figure S4. Ethanol fermentation by Man5A- and Mnd2A-displaying and -secreting yeast cells in 1,4- $\beta$ -D-mannan-containing medium supplemented with purified enzymes.** Fermentation was performed in YPA medium (pH 5.0) containing 5 g/L 1,4- $\beta$ -D-mannan as a carbon source, and 500 U  $\beta$ -mannanase and 8 U  $\beta$ -mannosidase as purified enzymes. Cultures were initiated with an  $OD_{600}=20$  of yeast cells. Data are presented as the mean  $\pm$  standard deviation of separate cultivations ( $n = 3$  each).

**Table S1. List of primers**

**Construction of pFGK424**

*Amplification of the coding sequences for secretion signal sequence of  $\alpha$ -factor and FLO428 anchor*

5'–GGGGGCTAGCATGAGATTTCTTCAATTTT

5'–GGGGGGATCCTTAAATAATTGCCAGCAAT

**Construction of pFGK426-AaMan5A**

*Amplification of man5A-FLAG (w/o TAA) gene*

5'–TAAAAGAGACGTCGACCTTCCCCGGACGCCGAACCACAAC

5'–TTAAGCATGCGTCGACCTTGTCATCGTCATCCTTGTCGCTTCGACTGCG  
CATTGATGGCCGCCAC

**Construction of pFGK426-AaMan5A-TAA**

*Amplification of man5A-FLAG (w/ TAA) gene*

5'–TAAAAGAGACGTCGACCTTCCCCGGACGCCGAACCACAAC

5'–TTAAGCATGCGTCGACTTACTTGTCATCGTCATCCTTGTCGCTTCGACT  
GCGCATTGATGGCCGCCAC

**Construction of pFGK424-AaMnd2A**

*Amplification of mnd2A-HA (w/o TAA) gene*

5'–TAAAAGAGACGTCGACCAATATGTTTCGTGACCTGGGTACTGAAC

5'–TTAAGCATGCGTCGACAGCGTAATCTGGAACATCGTATGGGTATTCTCCCT  
CATTCAGATCCCACAG

**Construction of pFGK424-AaMnd2A-TAA**

*Amplification of mnd2A-HA (w/ TAA) gene*

5'–TAAAAGAGACGTCGACCAATATGTTTCGTGACCTGGGTACTGAAC

5'–TTAAGCATGCGTCGACTTAAGCGTAATCTGGAACATCGTATGGGTATTCTC  
CCTCATTCAGATCCCACAG

\*Underlining indicates restriction enzyme sites.

\*\*Undulating lines indicate the coding sequences for FLAG tag or HA tag.
